# Supplementary material for: Comprehensive analysis of the potential biological significance of cuproptosis-related gene LIPT2 in pan-cancer prognosis and immunotherapy
Source: Sci Rep. 2023 Dec 21;13:22910. doi: 10.1038/s41598-023-50039-x (PMC10739704; doi:10.1038/s41598-023-50039-x)
Supplement: Supplementary file 10 — Supplementary Table S3. [file 41598_2023_50039_MOESM10_ESM.xlsx]

## Sheet: Sheet1
Gene Symbol	Gene ID	PCC
AP001372.2	ENSG00000254837.2	0.53
POLD3	ENSG00000077514.8	0.43
KCNE3	ENSG00000175538.10	0.42
RP11-702H23.2	ENSG00000254974.1	0.41
C2CD3	ENSG00000168014.16	0.39
MRPL48	ENSG00000175581.13	0.38
MECOM	ENSG00000085276.17	0.38
TMEM179B	ENSG00000185475.8	0.38
GS1-184P14.2	ENSG00000225071.1	0.37
COA4	ENSG00000181924.6	0.37
PARS2	ENSG00000162396.5	0.37
SPCS2	ENSG00000118363.11	0.36
MRPL3	ENSG00000114686.8	0.36
RP11-739B23.1	ENSG00000268635.2	0.36
RP11-800A3.7	ENSG00000257038.1	0.36
UCP2	ENSG00000175567.8	0.36
OTUB1	ENSG00000167770.11	0.35
RP11-80H5.5	ENSG00000249962.1	0.35
RP11-435O5.5	ENSG00000271155.1	0.35
TMEM189-UBE2V1	ENSG00000124208.16	0.35
ZNF503-AS2	ENSG00000237149.5	0.35
PRKCI	ENSG00000163558.12	0.35
RBM38	ENSG00000132819.16	0.35
PPME1	ENSG00000214517.8	0.35
RP11-727A23.5	ENSG00000247137.8	0.34
ALG3	ENSG00000214160.9	0.34
SLC29A2	ENSG00000174669.11	0.34
HAGLROS	ENSG00000226363.3	0.34
TTC30B	ENSG00000196659.9	0.34
HIST1H4C	ENSG00000197061.4	0.34
CTU1	ENSG00000142544.6	0.34
OGFRP1	ENSG00000182057.4	0.33
PLAGL2	ENSG00000126003.6	0.33
PRKRIR	ENSG00000137492.7	0.33
NR2F6	ENSG00000160113.5	0.33
ZNF503	ENSG00000165655.15	0.33
SAMD10	ENSG00000130590.13	0.33
ZNF628	ENSG00000197483.9	0.33
RP4-758J18.7	ENSG00000225905.1	0.33
WT1	ENSG00000184937.12	0.33
SNRPA	ENSG00000077312.8	0.33
YDJC	ENSG00000161179.13	0.33
RNF26	ENSG00000173456.4	0.33
FAM136A	ENSG00000035141.7	0.33
CHRAC1	ENSG00000104472.9	0.33
KRT8P3	ENSG00000254285.3	0.33
RP11-1348G14.8	ENSG00000275807.1	0.33
UVRAG	ENSG00000198382.8	0.33
RP11-3K16.2	ENSG00000242795.2	0.32
SOX17	ENSG00000164736.5	0.32
TMEM69	ENSG00000159596.6	0.32
TMBIM4	ENSG00000282031.1	0.32
NUDT16P1	ENSG00000246082.2	0.32
FAM60A	ENSG00000139146.13	0.32
WDR77	ENSG00000116455.13	0.32
CNOT7	ENSG00000198791.11	0.32
H2AFX	ENSG00000188486.3	0.32
GATC	ENSG00000257218.5	0.32
CSTF1	ENSG00000101138.11	0.32
RP11-483I13.5	ENSG00000260879.1	0.31
USP28	ENSG00000048028.11	0.31
LINC01224	ENSG00000269416.5	0.31
AP000892.4	ENSG00000250699.1	0.31
RPS2P7	ENSG00000235508.3	0.31
ARHGEF39	ENSG00000137135.17	0.31
RP11-53M11.5	ENSG00000274310.1	0.31
TAF4	ENSG00000130699.16	0.31
RP1-202O8.3	ENSG00000271746.1	0.31
XRRA1	ENSG00000166435.15	0.31
TMEM238	ENSG00000233493.3	0.31
PCNXL3	ENSG00000197136.4	0.31
ZSWIM1	ENSG00000168612.4	0.31
XXbac-BPG252P9.9	ENSG00000272540.1	0.31
RP11-603J24.9	ENSG00000257411.1	0.31
RP4-736L20.3	ENSG00000271989.1	0.31
SLC30A6	ENSG00000152683.14	0.31
RNF169	ENSG00000166439.5	0.31
TMEM248	ENSG00000106609.16	0.31
RAVER1	ENSG00000161847.13	0.31
CNOT11	ENSG00000158435.7	0.31
TGIF2	ENSG00000118707.9	0.3
DDIAS	ENSG00000165490.12	0.3
TMEM185B	ENSG00000226479.3	0.3
GS1-393G12.14	ENSG00000272115.1	0.3
RHNO1	ENSG00000171792.10	0.3
RCN2	ENSG00000117906.13	0.3
RP11-27G14.4	ENSG00000282221.1	0.3
SLC45A4	ENSG00000022567.9	0.3
RP5-1125A11.6	ENSG00000275784.1	0.3
FBRSL1	ENSG00000112787.12	0.3
OST4	ENSG00000228474.5	0.3
SMAD6	ENSG00000137834.14	0.3
C11orf30	ENSG00000158636.16	0.3
C2orf15	ENSG00000273045.5	0.3
WASH7P	ENSG00000227232.5	0.3
KRT8P33	ENSG00000250539.1	0.3
RP3-430N8.10	ENSG00000269972.1	0.3
RAB30-AS1	ENSG00000246067.7	0.3
RP11-535A19.2	ENSG00000255507.5	0.3
CABLES2	ENSG00000149679.11	0.3
